# Supplementary material for: Seasonal changes in daily temperature fluctuation control flowering through a time-dependent regulation of FLOWERING LOCUS T in Arabidopsis
Source: Research Square preprint supplement (doi:10.21203/rs.3.rs-7234857/v1), 2025-07-31
Supplement: Supplementary file 1 [file 35725754faea50925e61efeb.xlsx]

## Sheet: Sheet1
Supplementary Table 1 A list of genes upregulated undr 12/22°C compared to 22/22°C (logFC>1, p < 0.05, adjusted p-values for multiple comparisons using Benjamini–Hochberg Procedure)
Gene ID	Transcription factor (1) or not (0)	Gene Name	Gene Descriptions	ZT00_logFC	ZT00_logCPM	ZT00_PValue	ZT00_FDR	ZT04_logFC	ZT04_logCPM	ZT04_PValue	ZT04_FDR
AT4G25470	1	ATCBF2,CBF2,DREB1C,FTQ4	C-repeat/DRE binding factor 2	2.56086	1.97494	6.06592e-05	0.00120375	6.45063	0.313348	0.00016757	0.00345129
AT5G07880	0	ATSNAP29,SNAP29	synaptosomal-associated protein SNAP25-like 29	5.44406	-0.198201	0.0130446	0.0871706	6.38357	0.48697	0.00565955	0.0567091
AT5G60610	0		F-box/RNI-like superfamily protein	2.63478	0.183262	0.0328797	0.170971	5.526	-0.259177	0.00151946	0.0206444
AT1G67260	1	TCP1	TCP family transcription factor	5.66813	-0.00440642	0.00192709	0.0203968	5.36699	-0.320646	0.0140882	0.110157
AT4G38410	0		Dehydrin family protein	6.78583	0.643225	0.00301016	0.0289365	5.31519	-0.334261	0.00558057	0.0561844
AT3G09950	0			5.285	-0.259838	0.0210729	0.124456	4.76762	-0.601036	0.0499735	0.266574
AT4G14690	0	ELIP2	Chlorophyll A-B binding family protein	1.90192	5.42113	4.46526e-20	2.52025e-17	4.71912	8.80483	2.15304e-76	2.9545e-72
AT5G17260	1	anac086,NAC086,NAC86	NAC domain containing protein 86	2.60235	0.523957	0.00926593	0.0678932	4.44166	0.480458	0.00168948	0.0224324
AT3G22840	0	ELIP,ELIP1	Chlorophyll A-B binding family protein	1.46125	4.25752	1.55134e-07	6.96834e-06	4.17087	8.53395	6.24082e-77	1.71279e-72
AT2G42540	0	AtCOR15A,COR15,COR15A	cold-regulated 15a	1.93032	3.89504	9.89215e-10	8.37932e-08	4.09061	8.00505	5.74828e-52	1.97202e-48
AT4G24265	0			1.49072	2.24887	0.00512162	0.0434641	3.83338	1.9436	1.73588e-06	6.5262e-05
AT5G48070	0	ATXTH20,XTH20	xyloglucan endotransglucosylase/hydrolase 20	2.87786	2.33333	0.000197635	0.00321522	3.54176	2.51076	1.26704e-07	6.31292e-06
AT2G22590	0		UDP-Glycosyltransferase superfamily protein	2.18986	0.52533	0.0264927	0.146355	3.52895	4.18383	1.31035e-25	7.06084e-23
AT5G44110	0	ABCI21,ATNAP2,ATPOP1,POP1	P-loop containing nucleoside triphosphate hydrolases superfamily protein	1.1752	4.34111	7.26499e-05	0.00140414	3.47849	6.98482	3.10481e-58	1.42019e-54
AT5G15960	0	KIN1	stress-responsive protein (KIN1) / stress-induced protein (KIN1)	2.51031	2.05723	0.00566263	0.0469377	3.46848	4.18252	9.60009e-17	1.88196e-14
AT1G13609	0		Defensin-like (DEFL) family protein	1.60698	1.83765	0.0400684	0.196828	3.4651	1.32783	0.000501824	0.00848697
AT2G25150	0		HXXXD-type acyl-transferase family protein	4.79368	-0.513534	0.0393554	0.194439	3.45648	-0.219066	0.00791359	0.0720184
AT1G33090	0		MATE efflux family protein	5.19218	-0.317186	0.00484998	0.0416222	3.42735	0.639844	0.00135993	0.0188788
AT5G61160	0	AACT1,ACT	anthocyanin 5-aromatic acyltransferase 1	1.0105	3.52392	0.0352911	0.179622	3.42716	2.0026	0.00110673	0.0160192
AT1G26240	0		Proline-rich extensin-like family protein	2.59896	0.613758	0.0142905	0.0931774	3.3947	0.997721	0.00651343	0.0624758
AT1G04610	0	YUC3	YUCCA 3	2.20297	1.2488	0.00890859	0.0660265	3.21452	1.33701	0.000599091	0.00972903
AT5G15970	0	AtCor6.6,COR6.6,KIN2	stress-responsive protein (KIN2) / stress-induced protein (KIN2) / cold-responsive protein (COR6.6) / cold-regulated protein (COR6.6)	2.98814	6.05386	7.98321e-62	4.38199e-58	3.13507	8.24392	8.80991e-38	1.27257e-34
AT4G23200	0	CRK12	cysteine-rich RLK (RECEPTOR-like protein kinase) 12	5.09561	-0.328998	0.0112605	0.0782194	3.13095	1.35776	3.32899e-05	0.000869307
AT2G02120	0	LCR70,PDF2.1	Scorpion toxin-like knottin superfamily protein	2.29488	1.7077	0.00039289	0.00571561	3.0954	1.63125	0.000738367	0.0115336
AT5G52310	0	COR78,LTI140,LTI78,RD29A	low-temperature-responsive protein 78 (LTI78) / desiccation-responsive protein 29A (RD29A)	1.58468	3.38025	8.70942e-05	0.00163495	3.03336	6.92955	8.09925e-41	1.85237e-37
AT4G27360	0		Dynein light chain type 1 family protein	1.56602	1.97306	0.0160493	0.101609	2.93313	3.28594	2.09964e-06	7.76458e-05
AT2G43590	0		Chitinase family protein	1.67644	5.44107	3.49467e-12	5.15651e-10	2.82621	5.72472	2.35674e-34	2.8122e-31
AT1G03905	0	ABCI19,ATNAP4	P-loop containing nucleoside triphosphate hydrolases superfamily protein	1.84711	2.44978	0.000524154	0.00716405	2.7402	2.79425	3.41003e-09	2.22829e-07
AT5G38910	0		RmlC-like cupins superfamily protein	2.91803	1.85162	0.00253746	0.0253147	2.73153	2.65887	0.00046193	0.00790872
AT2G39510	0	UMAMIT14	nodulin MtN21 /EamA-like transporter family protein	2.3392	1.9055	0.000689125	0.00895928	2.67861	1.65435	0.00185053	0.0242772
AT4G26120	0		Ankyrin repeat family protein / BTB/POZ domain-containing protein	3.40167	1.15393	0.000114943	0.00205954	2.58003	0.715365	0.015731	0.118969
AT1G78860	0	GAL2	D-mannose binding lectin protein with Apple-like carbohydrate-binding domain	2.85763	1.72644	1.26763e-05	0.000313707	2.48367	1.61863	0.00110954	0.0160423
AT5G19890	0		Peroxidase superfamily protein	1.27976	1.56374	0.0342778	0.175904	2.40949	1.45381	0.0055622	0.0560611
AT1G32950	0		Subtilase family protein	4.3411	0.302803	0.000899344	0.0110783	2.36518	-0.0678879	0.0311955	0.193776
AT5G40590	0		Cysteine/Histidine-rich C1 domain family protein	4.61471	1.08645	7.3669e-07	2.75456e-05	2.33914	2.0329	4.85923e-05	0.00119286
AT5G17040	0		UDP-Glycosyltransferase superfamily protein	2.93191	0.631295	0.00650634	0.0521362	2.31689	1.59198	0.00749965	0.0693241
AT3G05660	0	AtRLP33,RLP33	receptor like protein 33	2.61576	1.08583	0.000620764	0.00823038	2.30212	1.68598	0.000592741	0.00965446
AT3G51240	0	F3'H,F3H,TT6	flavanone 3-hydroxylase	1.09321	4.753	3.67186e-06	0.000109776	2.29865	7.92612	4.05634e-40	7.95188e-37
AT1G17180	0	ATGSTU25,GSTU25	glutathione S-transferase TAU 25	3.16283	3.4244	5.34332e-10	4.74587e-08	2.2547	4.02752	1.17131e-05	0.000354428
AT3G55120	0	A11,AtCHI,CFI,CHI,TT5	Chalcone-flavanone isomerase family protein	1.55388	4.64042	1.17962e-12	1.9621e-10	2.24299	6.87383	2.49825e-34	2.85686e-31
AT4G16807	0			2.80266	0.267962	0.00926055	0.0678932	2.24129	1.32731	0.0146447	0.113027
AT1G17170	0	ATGSTU24,GST,GSTU24	glutathione S-transferase TAU 24	1.84377	4.4551	3.14324e-12	4.68837e-10	2.23436	5.63304	1.14449e-23	4.83238e-21
AT2G15490	0	UGT73B4	UDP-glycosyltransferase 73B4	1.95332	2.74689	0.000117684	0.00209593	2.20785	3.27695	1.56737e-09	1.08628e-07
AT2G22500	0	ATPUMP5,DIC1,UCP5	uncoupling protein 5	1.77526	4.10668	1.79924e-08	1.09248e-06	2.19744	5.35721	1.50357e-22	5.81202e-20
AT3G02990	1	ATHSFA1E,HSFA1E	heat shock transcription factor A1E	1.30335	3.13564	0.000790054	0.0100245	2.18743	2.8398	2.74065e-06	9.79389e-05
AT3G49110	0	ATPCA,ATPRX33,PRX33,PRXCA	peroxidase CA	1.92479	5.0776	2.03825e-14	4.58522e-12	2.18258	4.921	3.05372e-15	4.87264e-13
AT1G16850	0			5.02598	0.854975	0.000196736	0.00320441	2.12663	2.02352	0.000580622	0.00951922
AT5G08640	0	ATFLS1,FLS,FLS1	flavonol synthase 1	1.55972	5.35465	3.97207e-16	1.12385e-13	2.10444	7.58643	5.60819e-32	5.13056e-29
AT2G47780	0	LDAP2,SRP2	Rubber elongation factor protein (REF)	2.44478	1.07096	0.0192715	0.116628	2.08797	1.96246	0.0127547	0.102355
AT3G18010	1	WOX1	WUSCHEL related homeobox 1	1.03442	2.59803	0.0360715	0.18266	2.07224	2.62389	2.0492e-05	0.000573646
AT1G20450	0	ERD10,LTI29,LTI45	Dehydrin family protein	1.93036	6.42335	1.24173e-27	1.62282e-24	2.07067	8.0022	8.89768e-30	7.18226e-27
AT4G30830	0		Protein of unknown function, DUF593	2.70164	1.2802	0.00846771	0.0635136	2.0676	1.38194	0.003232	0.0372385
AT1G17710	0	AtPEPC1,PEPC1	Pyridoxal phosphate phosphatase-related protein	1.77818	1.35784	0.00898079	0.066436	2.05801	1.70678	0.0060101	0.0591257
AT3G61680	0	PLIP1	alpha/beta-Hydrolases superfamily protein	1.68651	1.06186	0.0337441	0.173949	2.05358	1.53668	0.0172771	0.1271
AT2G39980	0		HXXXD-type acyl-transferase family protein	1.5912	4.56122	3.14064e-09	2.34863e-07	2.02359	3.43172	8.12586e-09	5.02284e-07
AT3G13100	0	ABCC7,ATMRP7,MRP7,MRP7	multidrug resistance-associated protein 7	1.88022	1.04879	0.0275244	0.150226	2.02351	2.08051	0.0036073	0.0404751
AT4G08770	0	Prx37	Peroxidase superfamily protein	1.58196	4.077	4.20526e-05	0.000891911	2.01668	3.9623	2.51546e-05	0.000678827
AT3G44450	0	BIC2		1.74454	3.10224	3.49714e-05	0.000761738	2.01145	6.1208	1.65974e-22	6.15563e-20
AT4G30290	0	ATXTH19,XTH19	xyloglucan endotransglucosylase/hydrolase 19	3.6565	5.08642	7.86193e-34	1.54122e-30	1.99337	5.19857	4.76604e-08	2.56982e-06
AT2G02010	0	GAD4	glutamate decarboxylase 4	1.87557	1.99299	0.00932134	0.0680564	1.98547	2.58039	1.19076e-05	0.000358732
AT3G55500	0	ATEXP16,ATEXPA16,ATHEXP ALPHA 1.7,EXP16,EXPA16	expansin A16	1.1406	3.8753	9.78545e-05	0.0018085	1.97839	1.42653	0.0087047	0.0772591
AT1G26790	1	CDF6	Dof-type zinc finger DNA-binding family protein	1.46935	6.01112	5.46963e-11	6.02868e-09	1.97684	2.73397	2.21893e-05	0.000609595
AT4G33905	0		Peroxisomal membrane 22 kDa (Mpv17/PMP22) family protein	4.7041	0.474978	0.00671336	0.0532972	1.96388	1.65407	0.00533617	0.0542814
AT5G16080	0	AtCXE17,CXE17	carboxyesterase 17	1.49659	1.90671	0.0310251	0.164157	1.961	1.97304	0.000700085	0.0110551
AT1G35910	0	AtTPPD,TPPD	Haloacid dehalogenase-like hydrolase (HAD) superfamily protein	2.17594	0.312809	0.0178512	0.109972	1.9571	2.3742	0.00267305	0.0319939
AT1G18970	0	GLP4	germin-like protein 4	2.08353	2.96016	5.60943e-07	2.16223e-05	1.92213	3.68294	0.0022623	0.0282094
AT2G14820	0	MEL3,NPY2	Phototropic-responsive NPH3 family protein	5.90521	0.171677	0.00405397	0.0362769	1.90966	1.1798	0.0226611	0.154633
AT3G14730	0		Pentatricopeptide repeat (PPR) superfamily protein	1.52062	2.12383	0.0225109	0.130093	1.90187	1.10466	0.00993959	0.0849026
AT5G20790	0			2.30245	3.79397	2.0988e-07	9.11419e-06	1.88682	3.34854	1.96282e-05	0.000553075
AT4G19050	0		NB-ARC domain-containing disease resistance protein	2.49423	0.249345	0.035992	0.182409	1.87717	0.506786	0.046331	0.254247
AT2G41230	0	ARL2,OSR1		2.01767	1.91349	0.0010399	0.0123872	1.86469	1.37184	0.00464359	0.0487627
AT1G65060	0	4CL3	4-coumarate:CoA ligase 3	1.19181	3.88816	1.21858e-05	0.000302386	1.85908	6.16529	1.46927e-18	3.50645e-16
AT2G44450	0	BGLU15	beta glucosidase 15	1.55286	2.47059	0.00866615	0.0646276	1.85624	2.63667	0.000177017	0.00362825
AT2G23050	0	MEL4,NPY4	Phototropic-responsive NPH3 family protein	2.57314	1.19823	0.00356138	0.0329209	1.8537	1.9759	0.00577583	0.0574339
AT3G52460	0		hydroxyproline-rich glycoprotein family protein	1.39794	1.80059	0.0125379	0.0848378	1.84806	1.29869	0.00853944	0.0761679
AT2G21660	0	ATGRP7,CCR2,GR-RBP7,GRP7,RBGA3	cold, circadian rhythm, and rna binding 2	1.45099	8.36128	3.21747e-15	8.10124e-13	1.81515	7.78437	1.78645e-13	2.26987e-11
AT1G48100	0	PGX3	Pectin lyase-like superfamily protein	1.10601	3.1566	0.00572478	0.0473385	1.81265	5.70085	3.37018e-18	7.58153e-16
AT2G16060	0	AHB1,ARATH GLB1,ATGLB1,GLB1,HB1,NSHB1,Pgb1	hemoglobin 1	1.99933	4.66879	4.02322e-17	1.31449e-14	1.81235	3.23946	2.8538e-06	0.000101454
AT5G05270	0	AtCHIL,CHIL	Chalcone-flavanone isomerase family protein	2.13924	5.14497	3.90892e-18	1.53257e-15	1.79767	7.35261	2.43411e-24	1.13227e-21
AT4G05450	0	ATMFDX1,MFDX1	mitochondrial ferredoxin 1	1.32565	2.89892	0.0113802	0.078931	1.79537	3.76262	2.43613e-07	1.10878e-05
AT3G09450	0			2.58726	5.31831	1.58423e-32	2.8986e-29	1.762	4.30509	1.8e-08	1.05333e-06
AT1G66830	0		Leucine-rich repeat protein kinase family protein	5.10784	-0.345737	0.00590464	0.0484791	1.7582	1.85265	0.00519734	0.0532517
AT5G59240	0		Ribosomal protein S8e family protein	2.31738	1.74978	0.000284631	0.00438516	1.75805	2.16126	0.00739951	0.0687647
AT4G26950	0		Protein of unknown function, DUF584	2.57384	1.24625	0.00196344	0.020662	1.739	2.9638	0.00119614	0.017027
AT4G10960	0	UGE5	UDP-D-glucose/UDP-D-galactose 4-epimerase 5	1.53227	2.04133	0.045938	0.217336	1.73515	3.23062	1.04476e-05	0.0003229
AT4G40010	0	SNRK2-7,SNRK2.7,SRK2F	SNF1-related protein kinase 2.7	2.41713	1.11182	0.00472307	0.040801	1.73323	2.6105	0.000142047	0.00300113
AT2G26820	0	ATPP2-A3,IAN10,PP2-A3	phloem protein 2-A3	1.87023	1.24717	0.0432819	0.208618	1.72085	1.47687	0.0249083	0.165322
AT3G51230	0			1.12963	2.39684	0.0326729	0.17038	1.67922	2.58238	0.000367024	0.00654515
AT5G59820	1	AtZAT12,RHL41,ZAT12	C2H2-type zinc finger family protein	1.06805	3.55569	0.0365952	0.184544	1.67433	3.18863	5.53871e-05	0.00133225
AT4G25110	0	AtMC2,AtMCP1c,MC2,MCP1c	metacaspase 2	1.33757	3.13079	0.000378207	0.00553299	1.66586	1.23837	0.0387575	0.225551
AT5G06860	0	ATPGIP1,PGIP1	polygalacturonase inhibiting protein 1	1.1095	6.42368	2.36882e-08	1.37738e-06	1.62374	6.03638	1.07227e-12	1.17713e-10
AT3G52520	0			1.02857	2.25171	0.0478499	0.223454	1.60445	1.16291	0.0317101	0.195789
AT4G32460	0	BDX	Protein of unknown function, DUF642	2.64952	5.48287	2.72392e-28	4.15323e-25	1.58159	5.44269	6.86935e-11	5.85644e-09
AT3G28510	0		P-loop containing nucleoside triphosphate hydrolases superfamily protein	2.77571	1.76622	0.000255644	0.00401109	1.57705	2.55464	0.00441817	0.047017
AT3G48700	0	ATCXE13,CXE13	carboxyesterase 13	2.16597	0.403347	0.0480485	0.224229	1.56514	1.59558	0.00838564	0.0751122
AT5G58390	0		Peroxidase superfamily protein	1.25047	4.26393	5.17272e-05	0.00105144	1.52172	4.63057	4.3905e-07	1.90359e-05
AT4G01870	0		tolB protein-related	1.25352	5.75769	0.000104796	0.00191237	1.51139	6.50134	1.0887e-12	1.18569e-10
AT5G05560	0	APC1,EMB2771	E3 ubiquitin ligase, putative	1.29605	2.58517	0.00807238	0.0613023	1.50676	2.77383	0.00160563	0.0215801
AT5G41315	1	GL3,GL3,MYC6.2	basic helix-loop-helix (bHLH) DNA-binding superfamily protein	2.63706	-0.260419	0.0390301	0.19311	1.50145	1.28051	0.033089	0.201729
AT5G60630	0			1.33576	2.12563	0.0093275	0.0680833	1.4942	1.79965	0.0173931	0.127737
AT5G48657	0		defense protein-related	1.63704	2.25932	0.0219627	0.127894	1.49247	2.16355	0.0204209	0.142827
AT5G51060	0	ATRBOHC,RBOHC,RHD2	NADPH/respiratory burst oxidase protein D	1.89154	1.94134	0.00598611	0.0489829	1.49135	2.11208	0.00618916	0.0603201
AT1G29395	0	COR413-TM1,COR413IM1,COR414-TM1	COLD REGULATED 314 INNER MEMBRANE 1	3.27577	4.19148	2.13684e-23	1.83268e-20	1.47667	4.53886	1.55688e-05	0.000454558
AT2G14900	0		Gibberellin-regulated family protein	1.02601	4.71302	9.50549e-05	0.00176867	1.47075	3.894	3.13e-06	0.000110415
AT1G09780	0	iPGAM1	Phosphoglycerate mutase, 2,3-bisphosphoglycerate-independent	1.84326	7.20279	1.41188e-19	7.04529e-17	1.46468	7.38277	1.00694e-13	1.33504e-11
AT2G40100	0	LHCB4.3,LHCB8	light harvesting complex photosystem II	1.10503	7.20292	3.1867e-06	9.76103e-05	1.45296	6.99462	5.68942e-12	5.5568e-10
AT3G30180	0	BR6OX2,CYP85A2	brassinosteroid-6-oxidase 2	1.59319	5.01407	6.39125e-12	8.85898e-10	1.45094	5.62594	5.89014e-13	6.82088e-11
AT3G44550	0	FAR5	fatty acid reductase 5	1.21226	3.7112	0.000521732	0.00714518	1.44669	4.47224	0.00229195	0.0284369
AT5G56120	0			1.23466	3.96329	0.000506265	0.00698213	1.4312	3.64157	0.000280903	0.00528041
AT5G12940	0		Leucine-rich repeat (LRR) family protein	2.15992	3.93735	1.83329e-08	1.1107e-06	1.42649	4.03392	0.000173773	0.00356709
AT5G33300	0		chromosome-associated kinesin-related	1.76906	2.64326	0.00238683	0.0241543	1.39874	2.53946	0.00272394	0.0325462
AT1G77120	0	ADH,ADH1,ATADH,ATADH1	alcohol dehydrogenase 1	1.11901	4.07043	0.0074854	0.0579154	1.3756	3.72717	2.27381e-05	0.000623424
AT5G22580	0		Stress responsive A/B Barrel Domain	2.00672	6.37895	3.16987e-13	5.83873e-11	1.37547	6.89168	2.29898e-13	2.84214e-11
AT1G23140	0	CAR8	Calcium-dependent lipid-binding (CaLB domain) family protein	1.85768	1.65775	0.0102761	0.0731777	1.36079	2.85964	0.00156883	0.0211476
AT5G54470	1	BBX29	B-box type zinc finger family protein	1.05186	3.52735	0.0127509	0.08594	1.35754	4.90593	1.20222e-08	7.18845e-07
AT5G25460	0	DGR2	Protein of unknown function, DUF642	1.09105	9.05582	3.61972e-12	5.30943e-10	1.34511	8.73982	5.09797e-14	6.99568e-12
AT5G22140	0		FAD/NAD(P)-binding oxidoreductase family protein	1.69023	3.07079	0.000112618	0.00202409	1.34254	3.92564	0.000408838	0.00713776
AT2G19970	0		CAP (Cysteine-rich secretory proteins, Antigen 5, and Pathogenesis-related 1 protein) superfamily protein	1.59476	3.33233	0.000364758	0.00536197	1.34174	2.84153	0.0200007	0.140929
AT1G20930	0	CDKB2;2	cyclin-dependent kinase B2;2	1.21421	3.70542	0.000297026	0.00452128	1.33922	3.39204	5.66761e-05	0.00135849
AT2G25880	0	AtAUR2,AUR2	ataurora2	1.21593	3.5563	0.000718129	0.0092314	1.32797	3.20652	0.00090249	0.0136242
AT4G13930	0	SHM4	serine hydroxymethyltransferase 4	1.41527	8.0103	1.49134e-17	5.3855e-15	1.32791	9.16444	7.5192e-19	1.87604e-16
AT4G22320	0			1.10949	2.63056	0.026446	0.146215	1.31916	2.66038	0.00297515	0.0348345
AT4G35970	0	APX5	ascorbate peroxidase 5	1.33766	2.15621	0.00974976	0.0703423	1.30394	1.83962	0.0219576	0.150883
AT4G35730	0	ISTL3	Regulator of Vps4 activity in the MVB pathway protein	1.27449	3.62635	0.00013207	0.00231018	1.2865	2.91433	0.00393877	0.0432053
AT3G02640	0			1.08569	4.77902	9.43524e-06	0.000244523	1.28118	4.67295	0.00024736	0.00479436
AT3G42725	0		Putative membrane lipoprotein	1.08146	2.13799	0.0489938	0.227019	1.27878	1.87219	0.0377119	0.221439
AT4G33070	0	AtPDC1,PDC1	Thiamine pyrophosphate dependent pyruvate decarboxylase family protein	1.62057	1.88926	0.0136888	0.0901797	1.27191	3.39511	0.00325348	0.0374232
AT3G27400	0	PLL18	Pectin lyase-like superfamily protein	1.81585	3.03833	0.00025388	0.0039884	1.27106	3.46286	0.0121276	0.0987368
AT4G30650	0		Low temperature and salt responsive protein family	1.85452	3.87643	1.15663e-07	5.3803e-06	1.26576	5.1146	1.12927e-06	4.47126e-05
AT2G32220	0		Ribosomal L27e protein family	1.56029	3.0835	7.84573e-05	0.00149948	1.26353	3.54482	0.00012675	0.00270713
AT5G64810	1	ATWRKY51,WRKY51	WRKY DNA-binding protein 51	2.04537	2.26581	7.41073e-05	0.00142728	1.24984	1.54879	0.0351601	0.210968
AT1G61380	0	LORE,SD1-29	S-domain-1 29	1.38528	4.79958	7.83255e-07	2.9066e-05	1.24266	4.22343	0.000570966	0.00937771
AT4G14630	0	GLP9	germin-like protein 9	1.8142	3.37853	6.37492e-07	2.42421e-05	1.24065	3.13868	0.00259428	0.0312281
AT1G18100	0	E12A11,MFT	PEBP (phosphatidylethanolamine-binding protein) family protein	1.21377	2.91987	0.0298526	0.159749	1.24	3.55713	6.3678e-05	0.00148736
AT1G11330	0	RDA2,SD1-13	S-locus lectin protein kinase family protein	1.23402	4.96672	1.76522e-08	1.07659e-06	1.23923	4.56798	2.3845e-06	8.6794e-05
AT4G36110	0	SAUR9	SAUR-like auxin-responsive protein family	1.20499	3.27461	0.000461921	0.00646477	1.23677	2.28036	0.0333056	0.202691
AT1G21060	0		Protein of unknown function, DUF547	1.14589	3.68909	0.000222202	0.00355588	1.23471	3.14771	0.00181418	0.0238916
AT5G45700	0		Haloacid dehalogenase-like hydrolase (HAD) superfamily protein	1.03827	3.70403	0.00086202	0.0107391	1.21621	3.74161	0.00138726	0.0191709
AT1G65250	0	ZRK14	Protein kinase superfamily protein	1.46375	2.94989	0.000617286	0.00819439	1.20951	2.66874	0.0187161	0.13482
AT2G25980	0		Mannose-binding lectin superfamily protein	1.18775	3.5349	0.0101377	0.0725868	1.20729	4.24538	0.0106457	0.0893214
AT2G38530	0	AtLtpI-5,cdf3,LP2,LTP2	lipid transfer protein 2	1.2721	4.60943	3.34978e-06	0.000101585	1.19624	4.93094	0.000776034	0.0120329
AT4G09500	0		UDP-Glycosyltransferase superfamily protein	1.24683	2.00068	0.0314215	0.165616	1.18918	4.53957	1.65846e-06	6.2695e-05
AT1G26250	0	EXT18	Proline-rich extensin-like family protein	1.2038	4.68813	2.17819e-07	9.38469e-06	1.18788	4.67728	0.0134694	0.10641
AT5G17220	0	ATGSTF12,GST26,GSTF12,TT19	glutathione S-transferase phi 12	1.41577	2.48392	0.00374895	0.0343309	1.18575	4.41244	0.000391794	0.00688104
AT4G33560	0	WIP5	Wound-responsive family protein	1.49685	2.55565	0.0136602	0.0900561	1.17985	3.23021	0.00258238	0.0311121
AT5G07475	0		Cupredoxin superfamily protein	2.10192	2.01478	0.000711796	0.00916288	1.17515	2.06161	0.0465607	0.255027
AT5G05790	1		Duplicated homeodomain-like superfamily protein	1.10002	3.40143	0.00864658	0.0645377	1.16789	3.55804	0.00096523	0.0144207
AT2G25510	0			1.47587	9.92949	1.32005e-25	1.39341e-22	1.16318	9.89908	8.19483e-07	3.34683e-05
AT5G36800	0			1.85686	4.23448	3.73551e-07	1.50324e-05	1.14337	3.56417	0.0028821	0.0340358
AT1G62380	0	ACO2,ATACO2	ACC oxidase 2	1.14791	9.48928	2.80482e-17	9.62228e-15	1.13789	9.47858	3.73105e-13	4.45212e-11
AT2G46110	0	KPHMT1,PANB1	ketopantoate hydroxymethyltransferase 1	1.49562	3.13794	0.000539517	0.00732297	1.13711	2.9079	0.00711303	0.0667409
AT1G02730	0	ATCSLD5,CSLD5,CSLD5,SOS6	cellulose synthase-like D5	1.28026	4.31501	4.49099e-07	1.77857e-05	1.12908	3.94809	3.56665e-05	0.000921721
AT5G19240	0		Glycoprotein membrane precursor GPI-anchored	2.67615	6.31164	1.77665e-25	1.80593e-22	1.10916	6.41364	6.6014e-07	2.76604e-05
AT2G38390	0		Peroxidase superfamily protein	1.17652	4.84331	1.12561e-07	5.26275e-06	1.10833	4.68263	0.0178929	0.130396
AT1G70630	0	RAY1	Nucleotide-diphospho-sugar transferase family protein	1.32149	2.40356	0.00526038	0.0443537	1.10819	2.18486	0.0250778	0.166006
AT1G72730	0		DEA(D/H)-box RNA helicase family protein	1.14623	4.18045	0.000421252	0.00602776	1.09791	4.4013	0.000234815	0.00459337
AT2G27402	0			1.37544	6.39794	7.08636e-10	6.14827e-08	1.09406	6.2097	2.89652e-08	1.62899e-06
AT5G25340	0		Ubiquitin-like superfamily protein	1.28015	4.6353	3.09246e-07	1.27055e-05	1.08107	3.44019	0.0110229	0.091535
AT3G63510	0		FMN-linked oxidoreductases superfamily protein	1.21393	3.18277	0.00202709	0.0212018	1.0749	3.3943	0.0167712	0.124435
AT2G20980	0	MCM10	minichromosome maintenance 10	1.94348	1.2459	0.00906915	0.0668116	1.07487	2.30294	0.0470627	0.256786
AT5G22300	0	AtNIT4,NIT4	nitrilase 4	1.00799	4.92706	4.69218e-06	0.000135697	1.07112	6.42863	8.74939e-09	5.38401e-07
AT2G25530	0		AFG1-like ATPase family protein	1.45458	2.33215	0.0109982	0.076962	1.06707	3.47526	0.0102509	0.0868256
AT1G06350	0	ADS4,AtADS4	Fatty acid desaturase family protein	1.67494	2.79084	0.00112806	0.0132273	1.06415	3.07322	0.0209463	0.145684
AT4G08300	0	UMAMIT17	nodulin MtN21 /EamA-like transporter family protein	1.52731	4.49175	5.36656e-09	3.84557e-07	1.05401	4.49277	0.000913037	0.0137607
AT5G62210	0		Embryo-specific protein 3, (ATS3)	1.14852	3.69047	0.0025748	0.0255756	1.04689	6.38877	8.28659e-08	4.29104e-06
AT2G23120	0		Late embryogenesis abundant protein, group 6	1.22043	6.39482	1.12704e-10	1.16723e-08	1.0413	6.58755	2.83421e-06	0.000100922
AT3G22231	0	PCC1	pathogen and circadian controlled 1	1.80795	7.04635	2.15046e-19	1.01757e-16	1.03062	6.36949	0.00416324	0.0450198
AT5G22500	0	FAR1	fatty acid reductase 1	2.85597	6.53753	5.70609e-65	5.22012e-61	1.02708	5.39034	4.27511e-05	0.00107151
AT3G21890	1	BBX31,miP1a	B-box type zinc finger family protein	1.35244	1.87505	0.0239626	0.136217	1.02308	3.47879	0.00640208	0.0617809
AT4G25630	0	ATFIB2,FIB2	fibrillarin 2	1.07829	5.72508	2.15174e-07	9.2999e-06	1.02103	6.5042	4.68616e-07	2.01902e-05
AT1G78570	0	ATRHM1,RHM1,ROL1	rhamnose biosynthesis 1	1.29087	6.37103	1.47512e-12	2.39555e-10	1.02005	8.43873	3.33271e-09	2.18819e-07
AT3G54400	0		Eukaryotic aspartyl protease family protein	1.70724	6.37707	5.76502e-19	2.51144e-16	1.01956	6.91521	1.58777e-08	9.35117e-07
AT4G36090	0	ALKBH9C	oxidoreductase, 2OG-Fe(II) oxygenase family protein	1.16494	3.22964	0.00294402	0.0284502	1.00449	3.50751	0.00242793	0.0296813
AT4G19120	0	ERD3	S-adenosyl-L-methionine-dependent methyltransferases superfamily protein	1.81494	5.88702	4.27121e-20	2.49411e-17	1.00368	6.16333	6.63256e-08	3.48051e-06
AT5G36910	0	THI2.2	thionin 2.2	3.15881	5.70349	6.4452e-43	1.47407e-39	1.00092	6.98672	9.3193e-07	3.78355e-05
