# Supplementary material for: Seasonal changes in daily temperature fluctuation control flowering through a time-dependent regulation of FLOWERING LOCUS T in Arabidopsis
Source: Research Square preprint supplement (doi:10.21203/rs.3.rs-7234857/v1), 2025-07-31
Supplement: Supplementary file 2 [file 72932a19de5a10bcbe422200.xlsx]

## Sheet: Sheet1
	Primers used for qPCR
	LOCUS	AGI code	Forward (5¢->3¢)	Reverse (5¢->3¢)	Comments
	IPP2	AT3G02780	GTATGAGTTGCTTCTCCAGCAAAG	GAGGATGGCTGCAACAAGTGT	Song et al., 2018
	PP2A	AT1G13320	GCGGTTGTGGAGAACATGATACG	GAACCAAACACAATTCGTTGCTG	Song et al., 2018
	CO	AT5G15840	CTACAACGACAATGGTTCCATTAAC	CAGGGTCAGGTTGTTGC	Song et al., 2018
	FT	AT1G65480	CTGGAACAACCTTTGGCAAT	TACACTGTTTGCCTGCCAAG	Song et al., 2018
	TSF	AT4G20370	CTCGGGAATTCATCGTATTG	CCTCTGGCAGTTGAAGTAAG	Song et al., 2018
	BBX27	AT1G68190	AGAAGAGAGCAAGAGTGGAGGA	ATTTGGTGCAAACCTGTCTGTG
	BBX28	AT4G27310	ATGGGGAAGAAGTGTGATTTATG	AAGTTGGGCCAAGACGAAG	Lin et al., 2018
	BBX29	AT5G54470	ACCTCTCCGATGAGGAGAACC	ACTTTCCTTGGCGATTTCAA	Mikelson and Thomasho, 2009
	BBX29		CGTCGTCTTCGGTTAGTAGTGG	GGTTCTCCTCATCGGAGAGGT	primers located within CDS (Supplementary Fig. 6a, 6d,10d)
	BBX30	AT4G15248	ATGTGTAGAGGGTTTGAGAAAGA	TGCGTCTGCCTCACAATACA	Heng et al., 2019
	BBX31	AT3G21890	GCAGAAGAAGTGACGGAGGA	CGCGTGAGTTTCTGACAAGA
	BBX32	AT3G21150	TGTGTCTCAAGCTCCGAGCTATCG	TTTCCCTCCCTCGCGCTCTGTTTA
	CAB3	AT2G34420	CGGAAGCGGCCGTGTGACAA	TCCAGCGGTGTCCCATCCGT
	SultR1;3	AT1G22150	CGAAATGTCACCTGTTACGG	GCTAGAACCAACTGAATGTCTCG
	LUC		CGGATTACCAGGGATTTCAGTC	CAGGCAGTTCTATGAGGCAGAG
	ChIP-qPCR primers
	LOCUS	amplicon	Forward (5¢->3¢)	Reverse (5¢->3¢)	Comments
	FT	1	ACGTCTCTACTTGGTTGCGT	ACCAAAAGGAAAATCATGTGGAGG
		2	TCAGTTGCTATGATGATTTTGAGGG	TTATTTTCTGCAACTTAGATTCGC
		3	ATGCACTATATGTTGCTTCGTAAGG	ATGAAGCCGTGATGTTCCTAAAC
		4	GGGTTTGGAATACCACAAACAG	GTATCATAGGCATGAACCCTCTAC
	EIF4		TGTTTTGCTTCGTTTCAAGGA	GCATTTTCCCGATTACAAC	Yamaguchi et al., 2014
